# Supplementary material for: Drone-based particle monitoring above two harmful algal blooms (HABs) in the USA
Source: Royal Society of Chemistry journal article supplement (doi:10.1039/d2ea00055e), 2022-01-01
Supplement: d2ea00055e1.pdf [file d2ea00055e1.pdf]

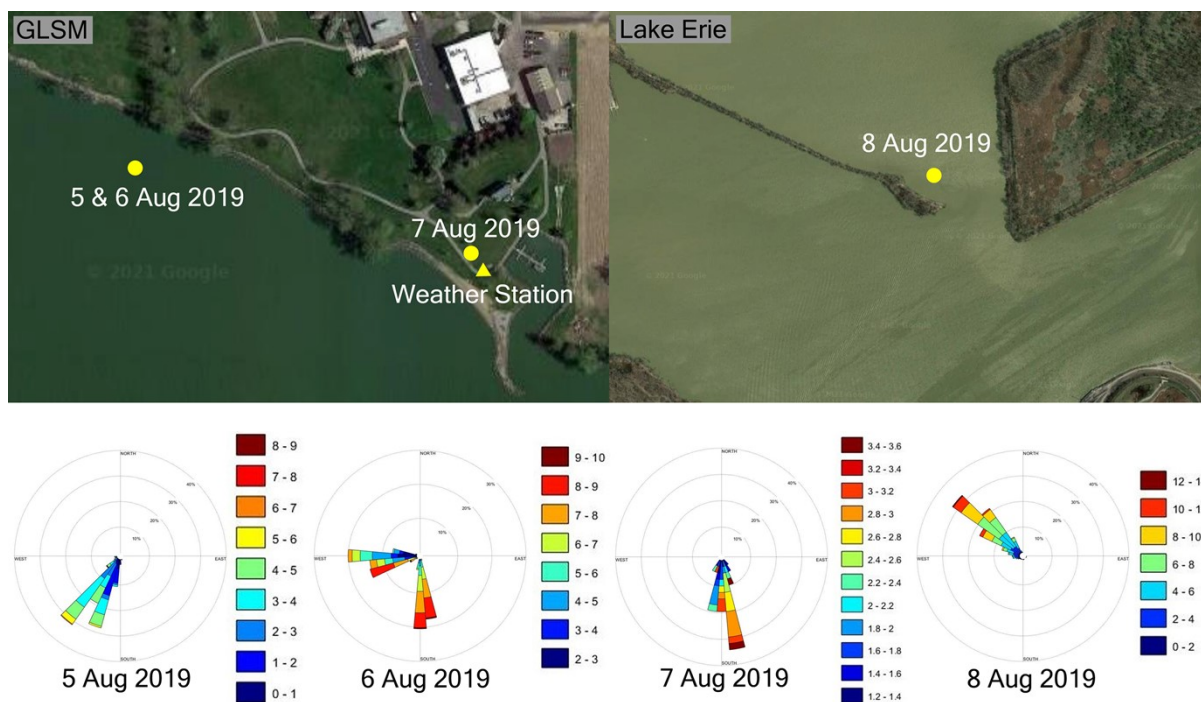

**Figure S1:** The three different sampling locations (marked with circles) along with the location of the wind sensor (marked with a triangle) are labeled on the two sites, GLSM, and LE respectively. A wind rose is included below each sample location to indicate the different fractions of wind direction and speed recorded each day measured in m/s.

**Table S1:** MCs and their quantifier and qualifier ions set in LC-MS/MS methods.

| Analyte                               | Quantifier ion (m/z) | Qualifier ion (m/z) |
|---------------------------------------|----------------------|---------------------|
| [D-Asp <sup>3</sup> ]-MC-RR           | 135.07               | 498.91              |
| MC-RR                                 | 135.07               | 212.94              |
| Nodularin                             | 135.00               | 389.16              |
| MC-YR                                 | 135.00               | 213.03              |
| MC-HtyR                               | 135.05               | 1031.46             |
| MC-LR                                 | 135.07               | 155.08              |
| [D-Asp <sup>3</sup> ] MC-LR           | 135.01               | 213.03              |
| MC-HilR                               | 135.00               | 155.08              |
| MC-WR                                 | 135.03               | 626.25              |
| MC-LA                                 | 776.41               | 375.16              |
| MC-LY                                 | 868.42               | 494.18              |
| MC-LW                                 | 517.18               | 446.17              |
| MC-LF                                 | 852.41               | 478.17              |
| C <sub>2</sub> D <sub>5</sub> MC-LR * | 135.09               | 163.08              |

\* Internal standard for MC method

5 Aug 2019 - GLSM

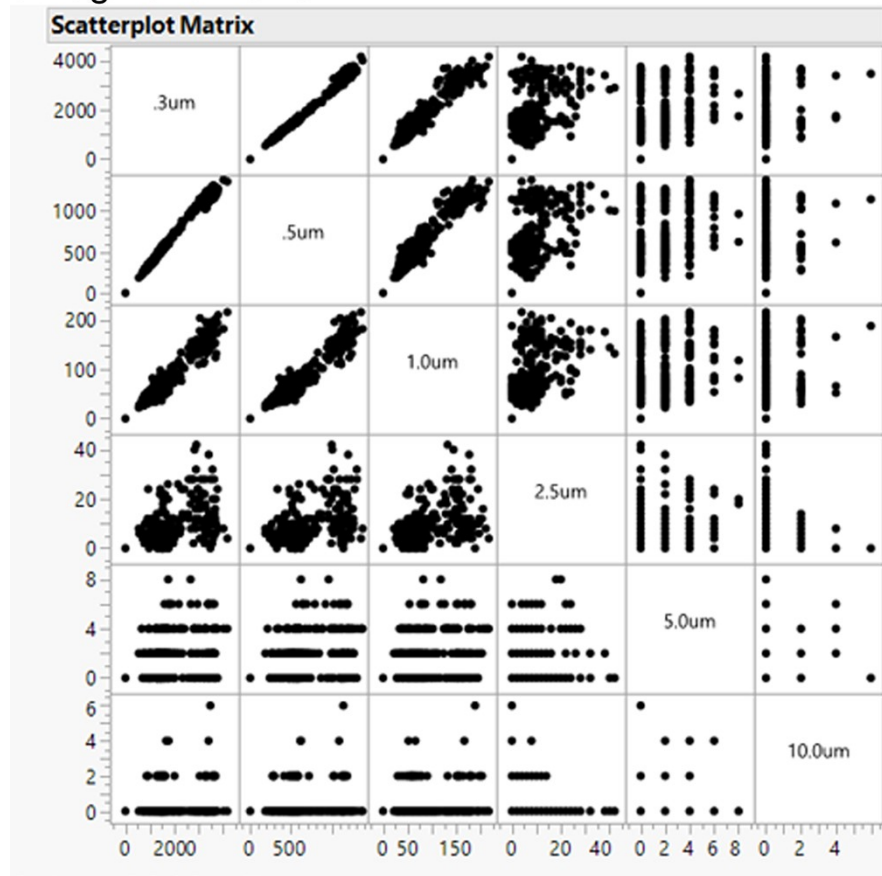

8 Aug 2019 - Erie

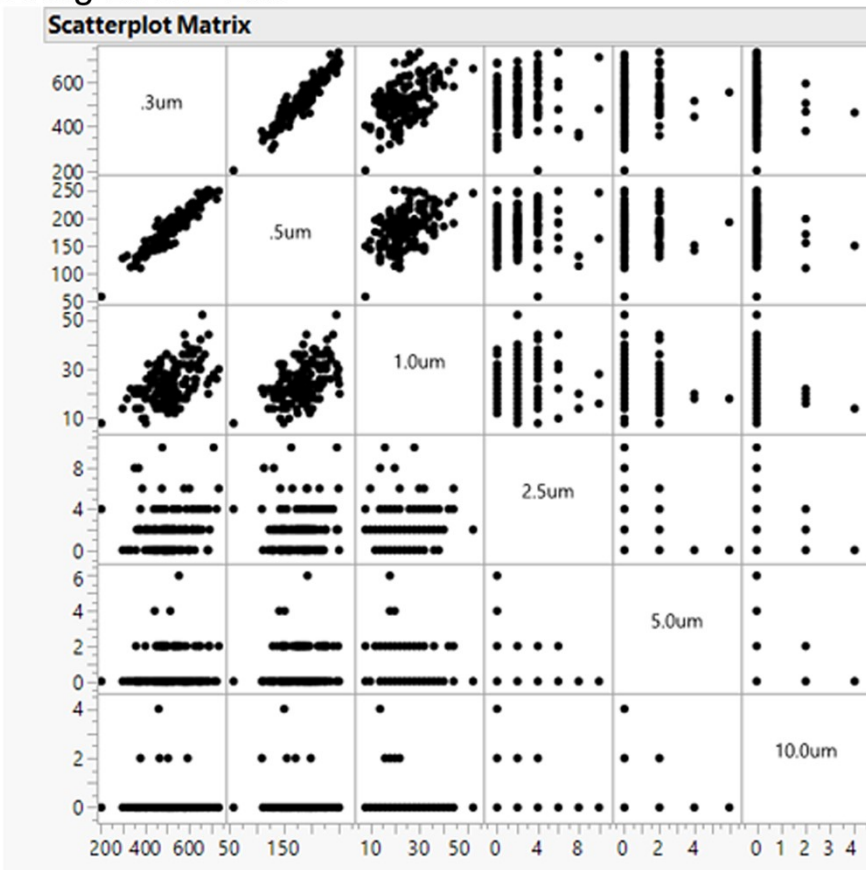

**Figure S2:** Graphical representation of the correlations between particle count size bins over a whole day at GLSM and at LE.

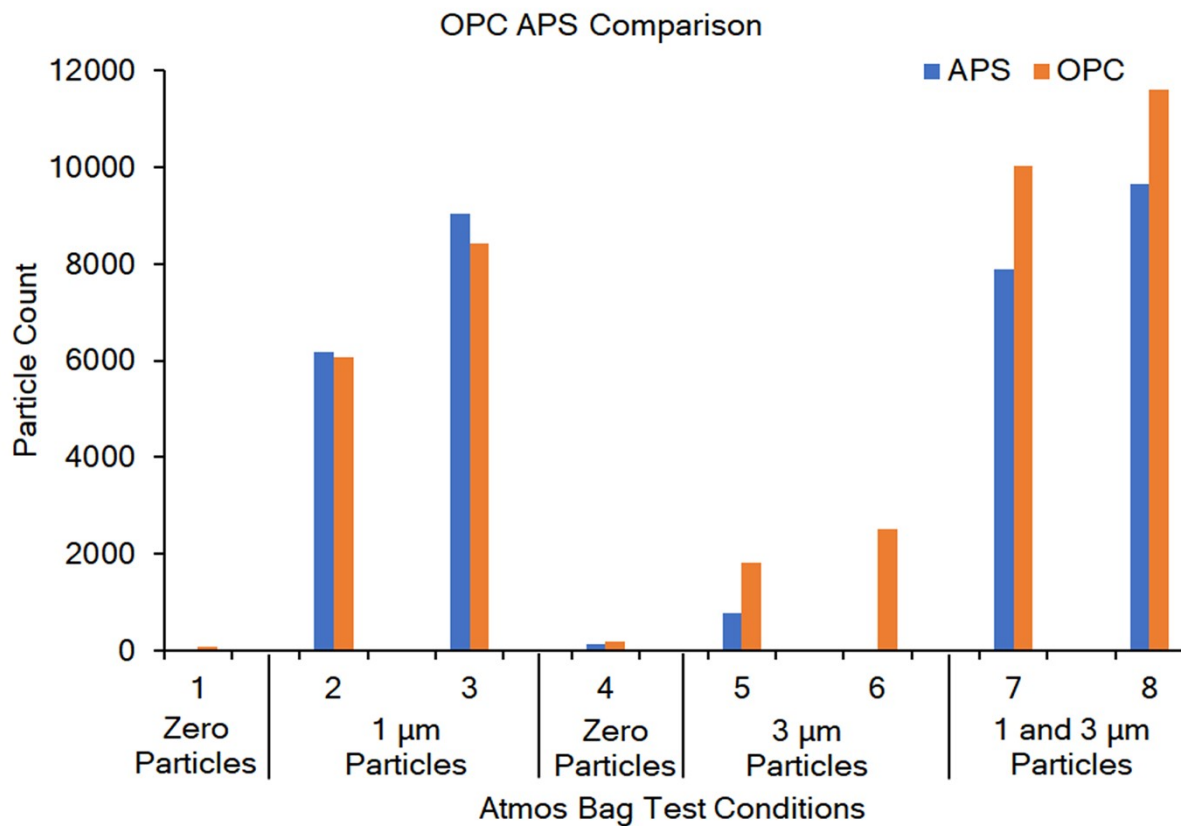

**Figure S3:** Calibration experiments for the OPC in the AirDROPS. Experiments were performed in a sealed bag filled with air mixed with different aerosolized particle sizes. Experiments 1 and 4 were done with no added particles as a chance to run a zero test for the sensors and give a background of particle levels in the bags. Experiments 2 and 3 were run with aerosolized 1 μm diameter particles, experiments 5 and 6 were run with aerosolized 3 μm diameter particles (data was not recovered from the APS in experiment 6), and experiments 7 and 8 contained both 1 μm and 3 μm particles. Overall, data recorded from the OPC across all of these calibration experiments were robust and consistent with simultaneous measurements recorded from the APS.
